# Supplementary material for: Electroless plating of premetalized polyamide fibers for stretchable conductive devices
Source: Royal Society of Chemistry journal article supplement (doi:10.1039/d3ra01566a), 2023-01-01
Supplement: d3ra01566a1.pdf [file d3ra01566a1.pdf]

# Electroless plating of premetalized polyamide fibers for stretchable conductive devices

P. Vishakha T. Weerasinghe,<sup>a</sup> Ruchira N. Wijesena,<sup>\*b</sup> Nadeeka D. Tissera,<sup>b</sup> Gayan Priyadarshana,<sup>d</sup> Nandula D. Wanasekara,<sup>a</sup> D.G. Kanchana Dissanayake<sup>a</sup> and K. M. Nalin de Silva<sup>\*c</sup>

\*Corresponding author: [ruchiraw@itum.mrt.ac.lk](mailto:ruchiraw@itum.mrt.ac.lk), [kmnd@chem.cmb.ac.lk](mailto:kmnd@chem.cmb.ac.lk)

a. Department of Textile and Clothing Textile and Clothing Technology, University of Moratuwa, Moratuwa, Sri Lanka.

b. Division of Textile and Clothing Technology, Institute of Technology, University of Moratuwa, Diyagama, Homagama.

c. Department of Chemistry, University of Colombo, Colombo 03, Sri Lanka.

d. Department of Engineering Technology, Faculty of Technology, University of Sri Jayewardenepura, Gangodawila, Nugegoda, Sri Lanka.

## S1. Preparation of fabric samples

Nylon-6 filament yarn was knitted into a single jersey a circular fabric with a diameter of 5cm, using circular lab knitting machine (Anytester, AT250F lab knitting machine). Then weighted fabric samples of 0.2 g were scoured to remove impurities utilizing 1 g/ml NaOH solution at 100°C for 1 minute, then rinsed by a counter flow of distilled water.

## S2. Fabrication of stretchable conductive device

A piece of silver plated yarn was layered on a stretchable fabric surface and two electrodes were attached to the two ends of the yarn. A of silicon rubber paste was printed on top of the yarn as shown in Fig. S1. Multiple print cure cycles were conducted to obtain 1mm thick layer of silicon.

The effect of stretching was observed by measuring the resistance of the device at variable percentages of displacements from the initial length. The strain was applied from 0-100% using a universal material testing machine (Instron 3365, USA). Resistance of the device for 100 stretch and recovery cycles was obtained by measuring the resistance of the device upon every stretch and recovery. Moreover, conductive stripes were knitted from silver plated yarns, elastomeric yarns and common nylon yarns by using a full computerized plain jacquard socks knitting machine(KJ-6F616, Zhuji Kejun Machinery Co., Ltd ) and resistance per 4cm of the strip was measured.

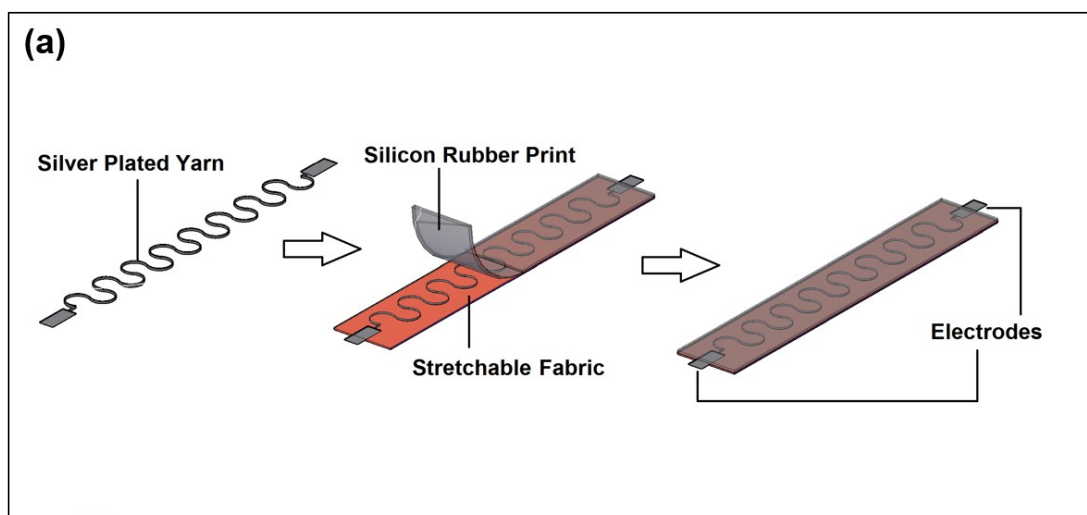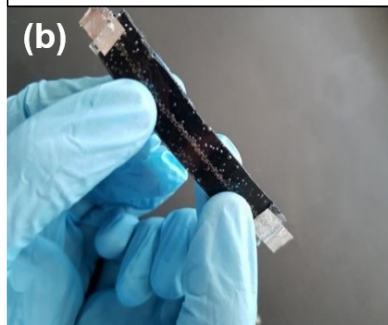

**Fig. S1.** (a) Schematic diagram of the fabrication process. (b) The device prepared by printing silicon layer on the yarn to stick yarn to the fabric and two electrodes are connected to ends of the print

### S3. Polyamide hydrolysis

H<sup>+</sup> ions in the solution hydrolysis the polyamide and generate polar groups such as –NH<sub>2</sub> and –COOH on the fiber surface (Fig. S2). Further, the hydride ions bond with resulted –NH<sub>2</sub> and formed NH<sub>3</sub><sup>+</sup> end groups on the fiber surface (Eq. 1).

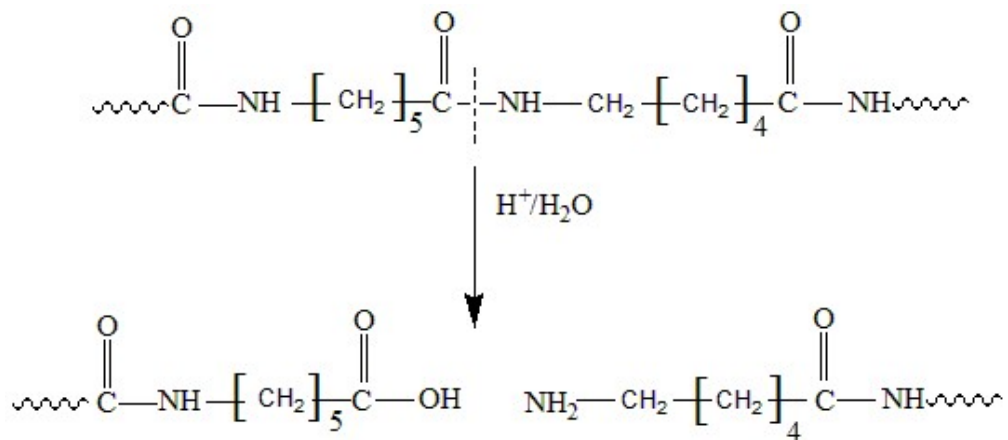

**Fig. S2.** Hydrolysis of polyamide in acid

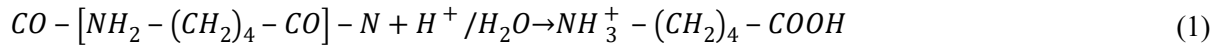

#### **S4. Silver reduction by Tollen's reagent**

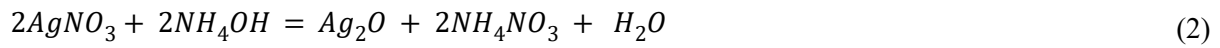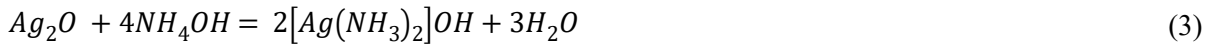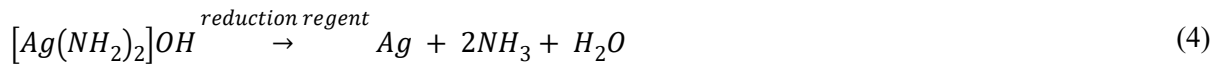

#### **S5. Silver nanoparticles**

Comparatively, Ag 20% formed particles with larger sizes. As shown in Fig. S2 silver particle size of Ag 20% was less than 1  $\mu\text{m}$ . Therefore, it can be claimed that particles formed by array of concentrations (Ag 2.5%, Ag 5%, Ag 10%, Ag 20%) are nano-size particles.

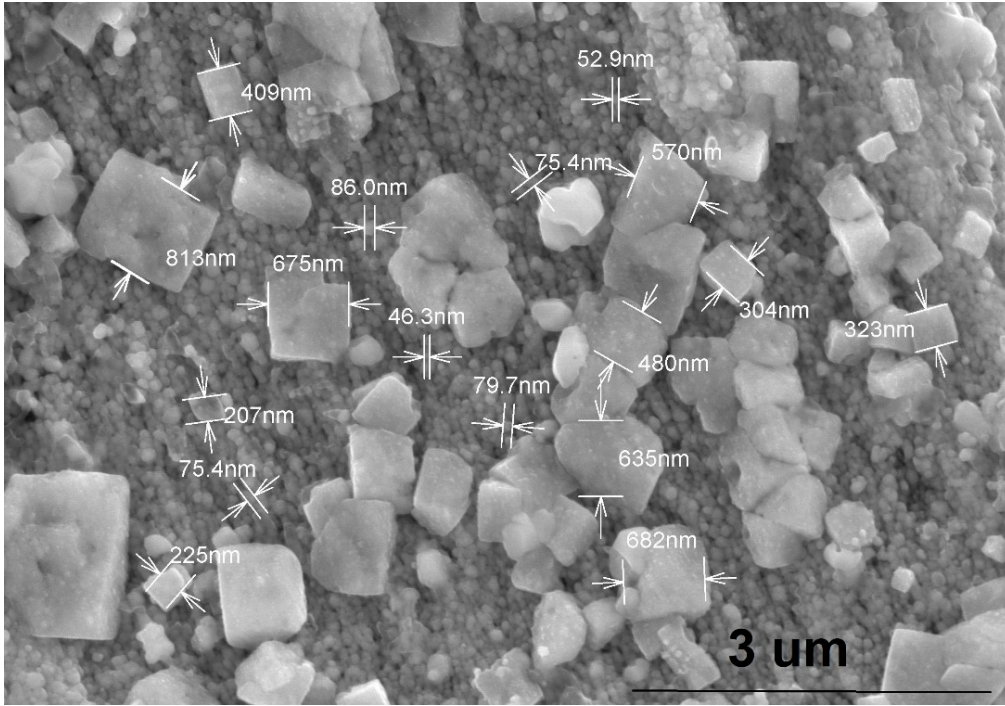

**Fig S2.** SEM image of Ag 20% with indicating the particle size

**S6. TGA analysis results**

**Table S1.** Ash content and weight loss data taken by TGA analysis.

| Yarn Sample | Ash content (%) | Weight loss (%) |
|-------------|-----------------|-----------------|
|             |                 |                 |

|           |       |       |
|-----------|-------|-------|
| Polyamide | 21.04 | 89.76 |
| WFR       | 21.27 | 57.85 |
| Ag 2.5%   | 22.48 | 58.48 |
| Ag 5%     | 31.15 | 52.59 |
| Ag 10%    | 43.96 | 37.80 |
| Ag 20%    | 50.43 | 19.52 |

### S6. Gauge Factor

The sensitivity of a strain sensor is generally evaluated with gauge factor (GF), which is the ratio of the percentage change of sensor response to the applied strain.

$$\text{Gauge Factor (G.F.)} = \frac{\Delta R/R_0}{\varepsilon} \quad (5)$$

where  $\Delta R$ ,  $R_0$ , and  $\varepsilon$  represent the change of resistance, the resistance at 0% strain, and the applied strain, respectively. The gauge factor increases from 0.20 to 0.33 in accordance with the increase of the applied strain from 13% to 100%.

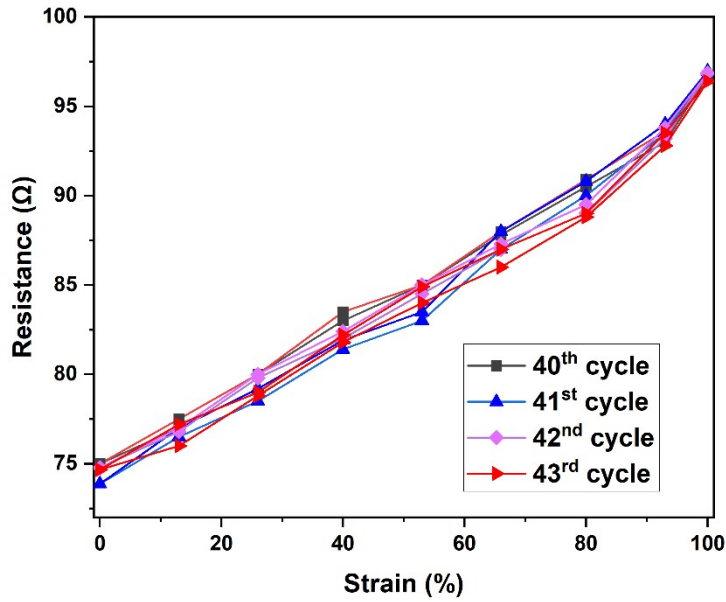

Fig S3. Hysteresis curves of the 40<sup>th</sup> to 43<sup>rd</sup> stretch/release cycles.

## S7. Hysteresis

## S8. Comparison

Table S2. Comparison among stretchable conductive devices

| Material                                   | Fabrication Method                                                          | Stretchability | Gauge Factor |
|--------------------------------------------|-----------------------------------------------------------------------------|----------------|--------------|
| PDMS-CNT                                   | Coating                                                                     | 100%           | 1.8 [1]      |
| Plasticized PVC-CNT                        | Mixing of CNT with a substrate and sandwiching electrodes with an elastomer | 100%           | 1.16 [2]     |
| PDMS-carbon nanotubes and silver nanowires | Spin coat PDMS on CNT or Ag nanowire percolation networks                   | 50%            | 0.05 [3]     |

Ag nanoparticle Sandwich the yarn between silicon rubber 100% 0.33  
coated nylon - (This  
Silicon rubber work)

## References

1. Jin, C.; Liu, D.; Li, M.; Wang, Y. Application of highly stretchy PDMS-based sensing fibers for sensitive weavable strain sensors. *Journal of Materials Science: Materials in Electronics* **2020**, *31*, 4788-4796.
2. Dong, T.; Gu, Y.; Liu, T.; Pecht, M. Resistive and capacitive strain sensors based on customized compliant electrode: Comparison and their wearable applications. *Sensors and Actuators A: Physical* **2021**, *326*, 112720.
3. Cao, L.; Wang, Z.; Liu, Y.; Shi, R.; Wang, X.; Liu, J. A general strategy for high performance stretchable conductors based on carbon nanotubes and silver nanowires. *RSC advances* **2017**, *7*, 20167-20171.
